# Supplementary material
Source: MDPI journal article supplement (https://www.mdpi.com/2306-5338/4/2/24)
Supplement: s1 [file s1]

## Supplementary Materials

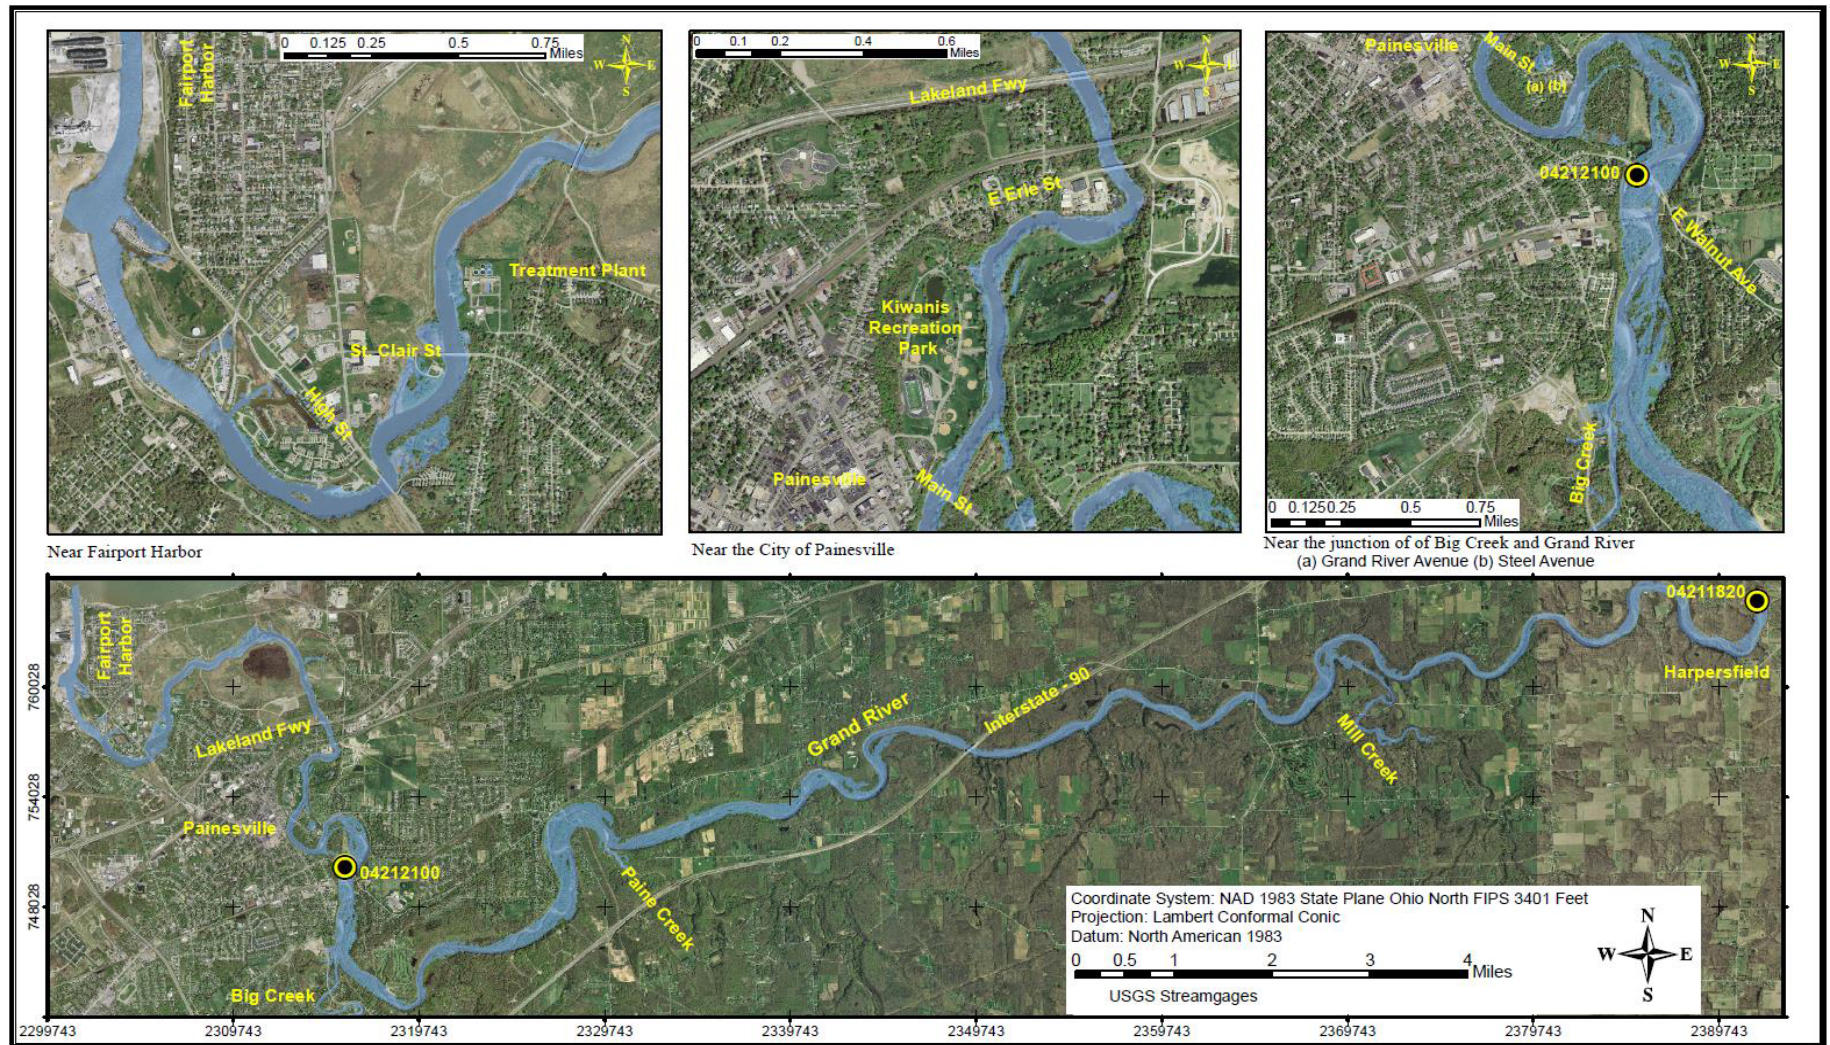

Figure S1 : Flood inundation map along the Grand River, for the stage of 10.00 feet, 605.59 feet NAVD 88 at 04212100 and the stage of 10.13 feet, 743.13 feet NAVD 88 at 04211820



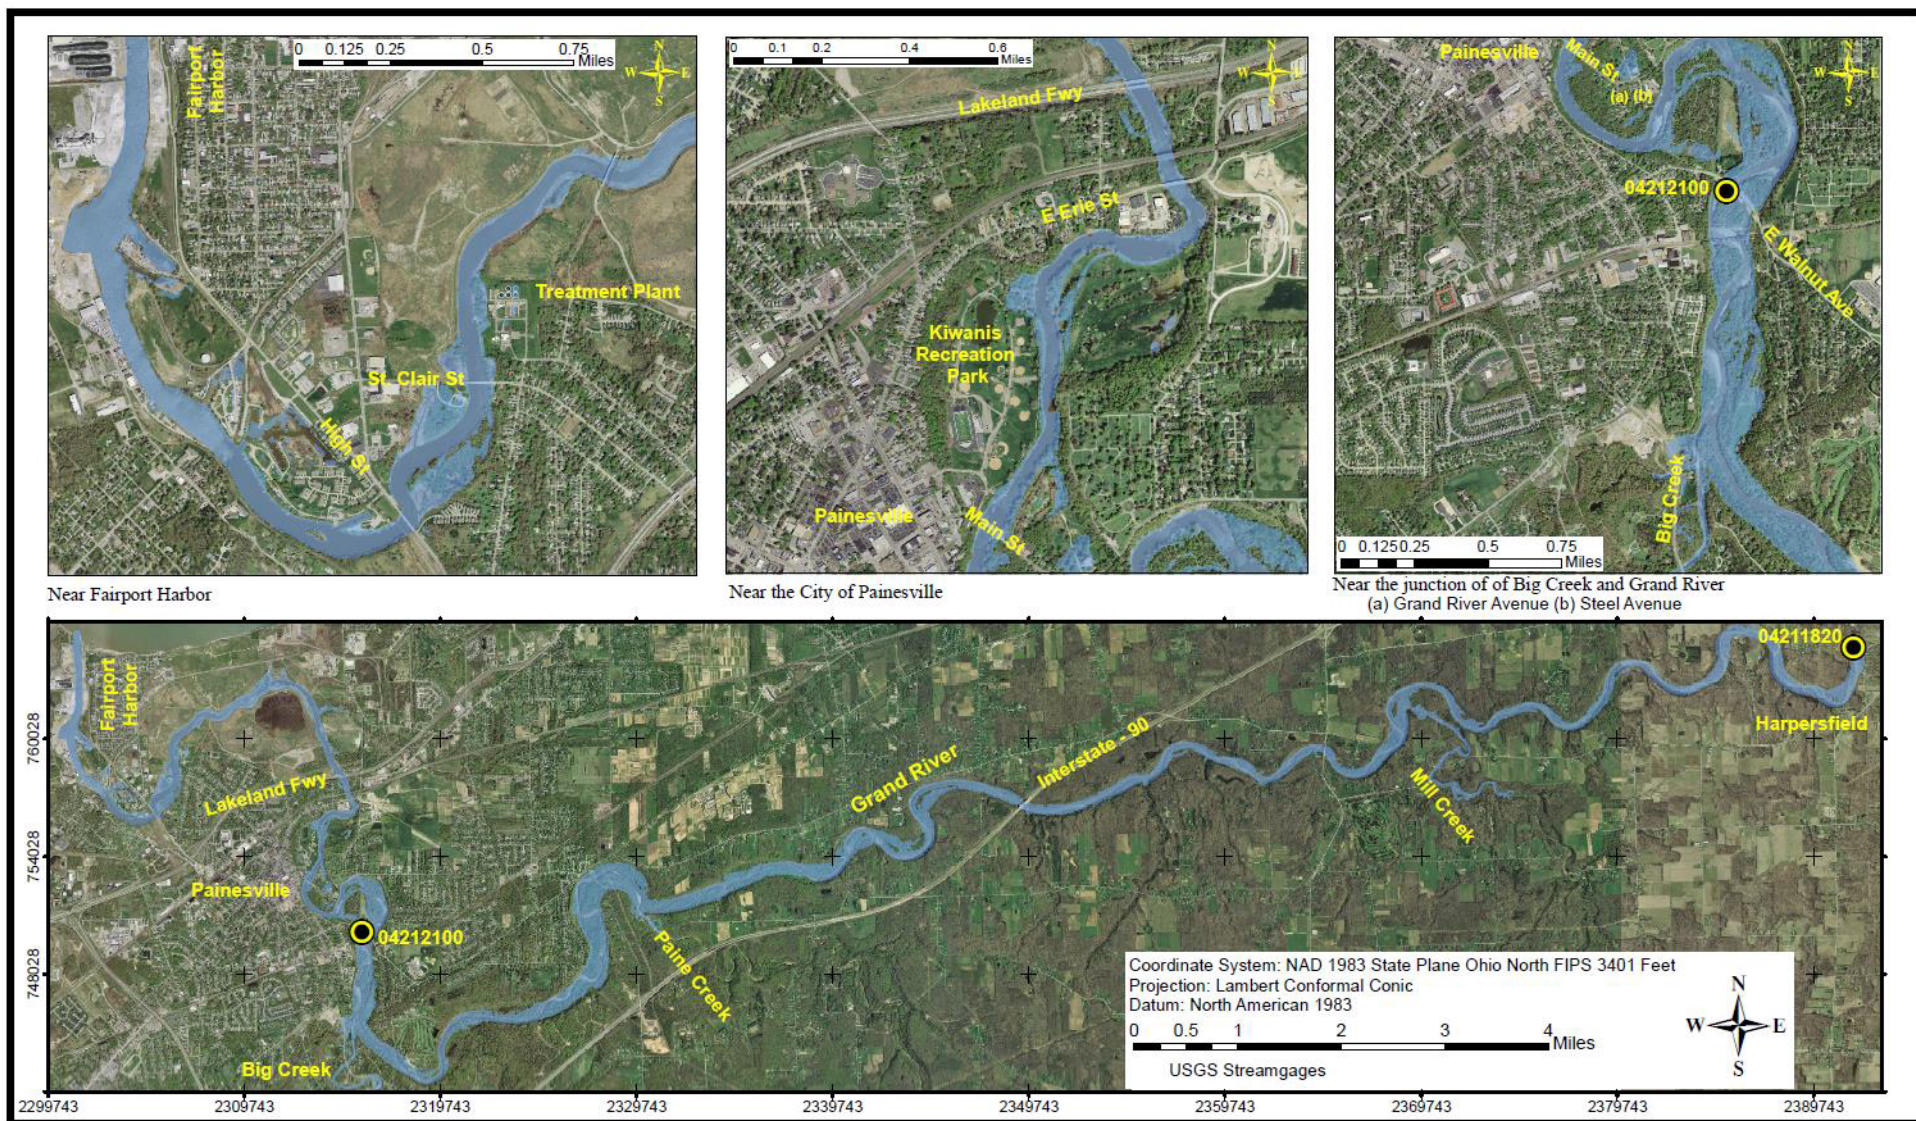

Figure S2 : Flood inundation map along the Grand River, for the stage of 11.00 feet, 606.59 feet NAVD 88 at 04212100 and the stage of 11.07 feet, 744.07 feet NAVD 88 at 04211820



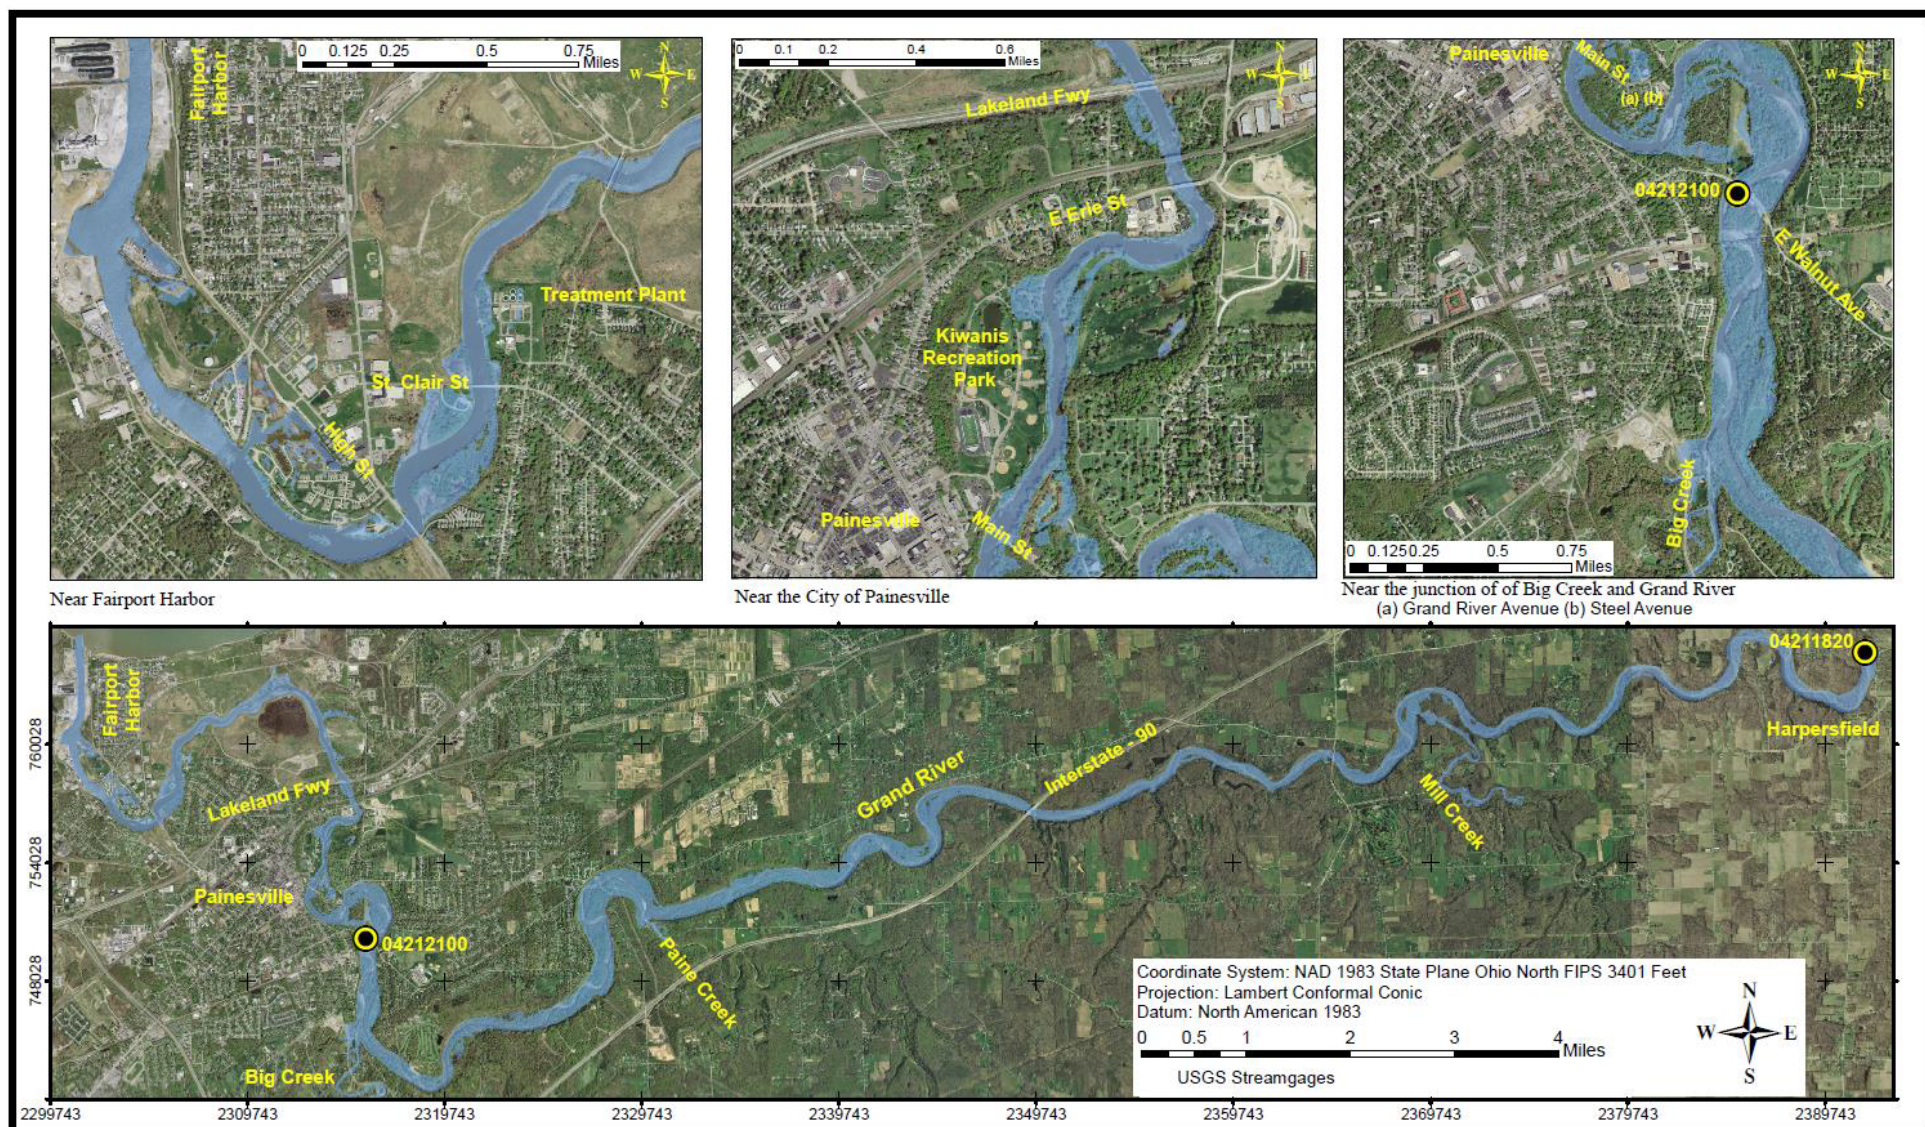

Figure S3 : Flood inundation map along the Grand River, for the stage of 12.00 feet, 607.59 feet NAVD 88 at 04212100 and the stage of 11.99 feet, 744.99 feet NAVD 88 at 04211820



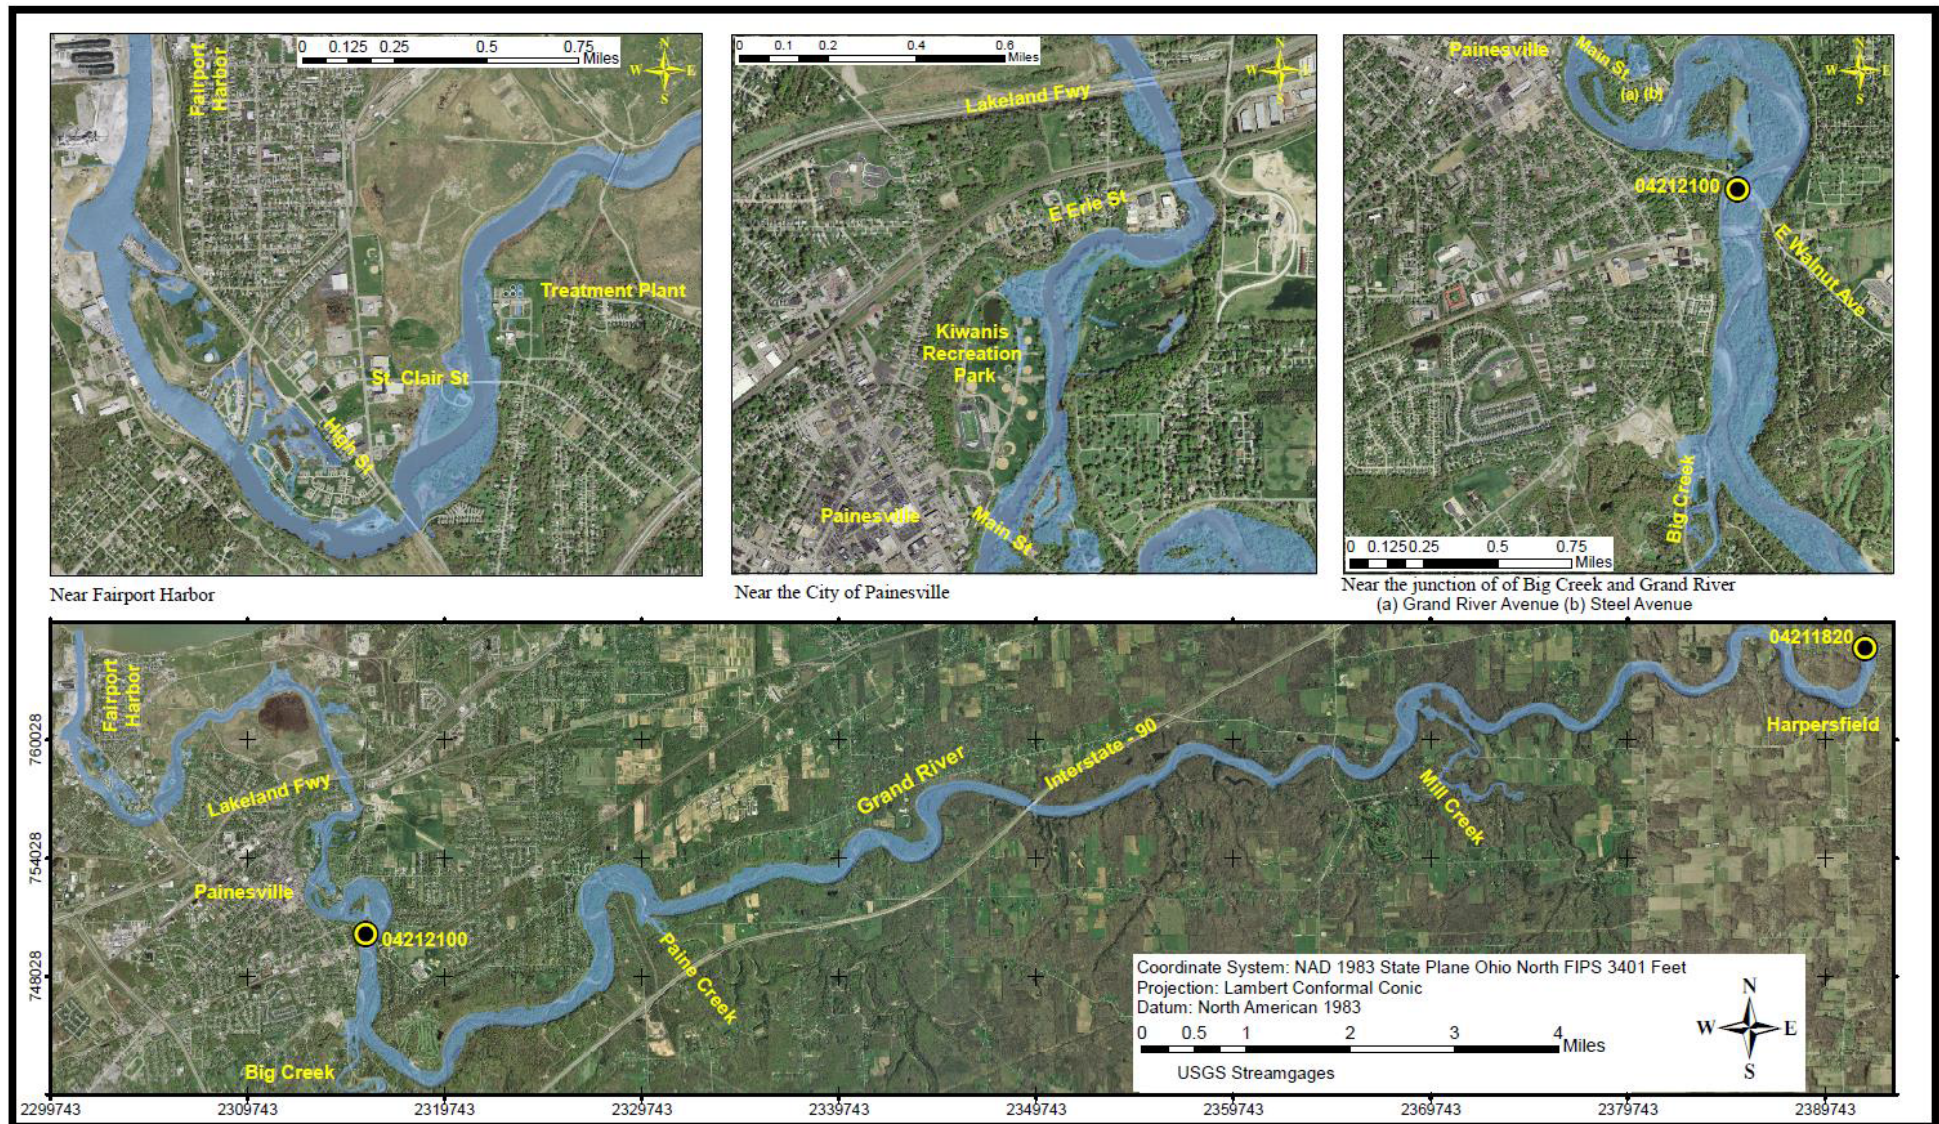

Figure S4 : Flood inundation map along the Grand River, for the stage of 13.00 feet, 608.59 feet NAVD 88 at 04212100 and the stage of 12.86 feet, 745.86 feet NAVD 88 at 04211820



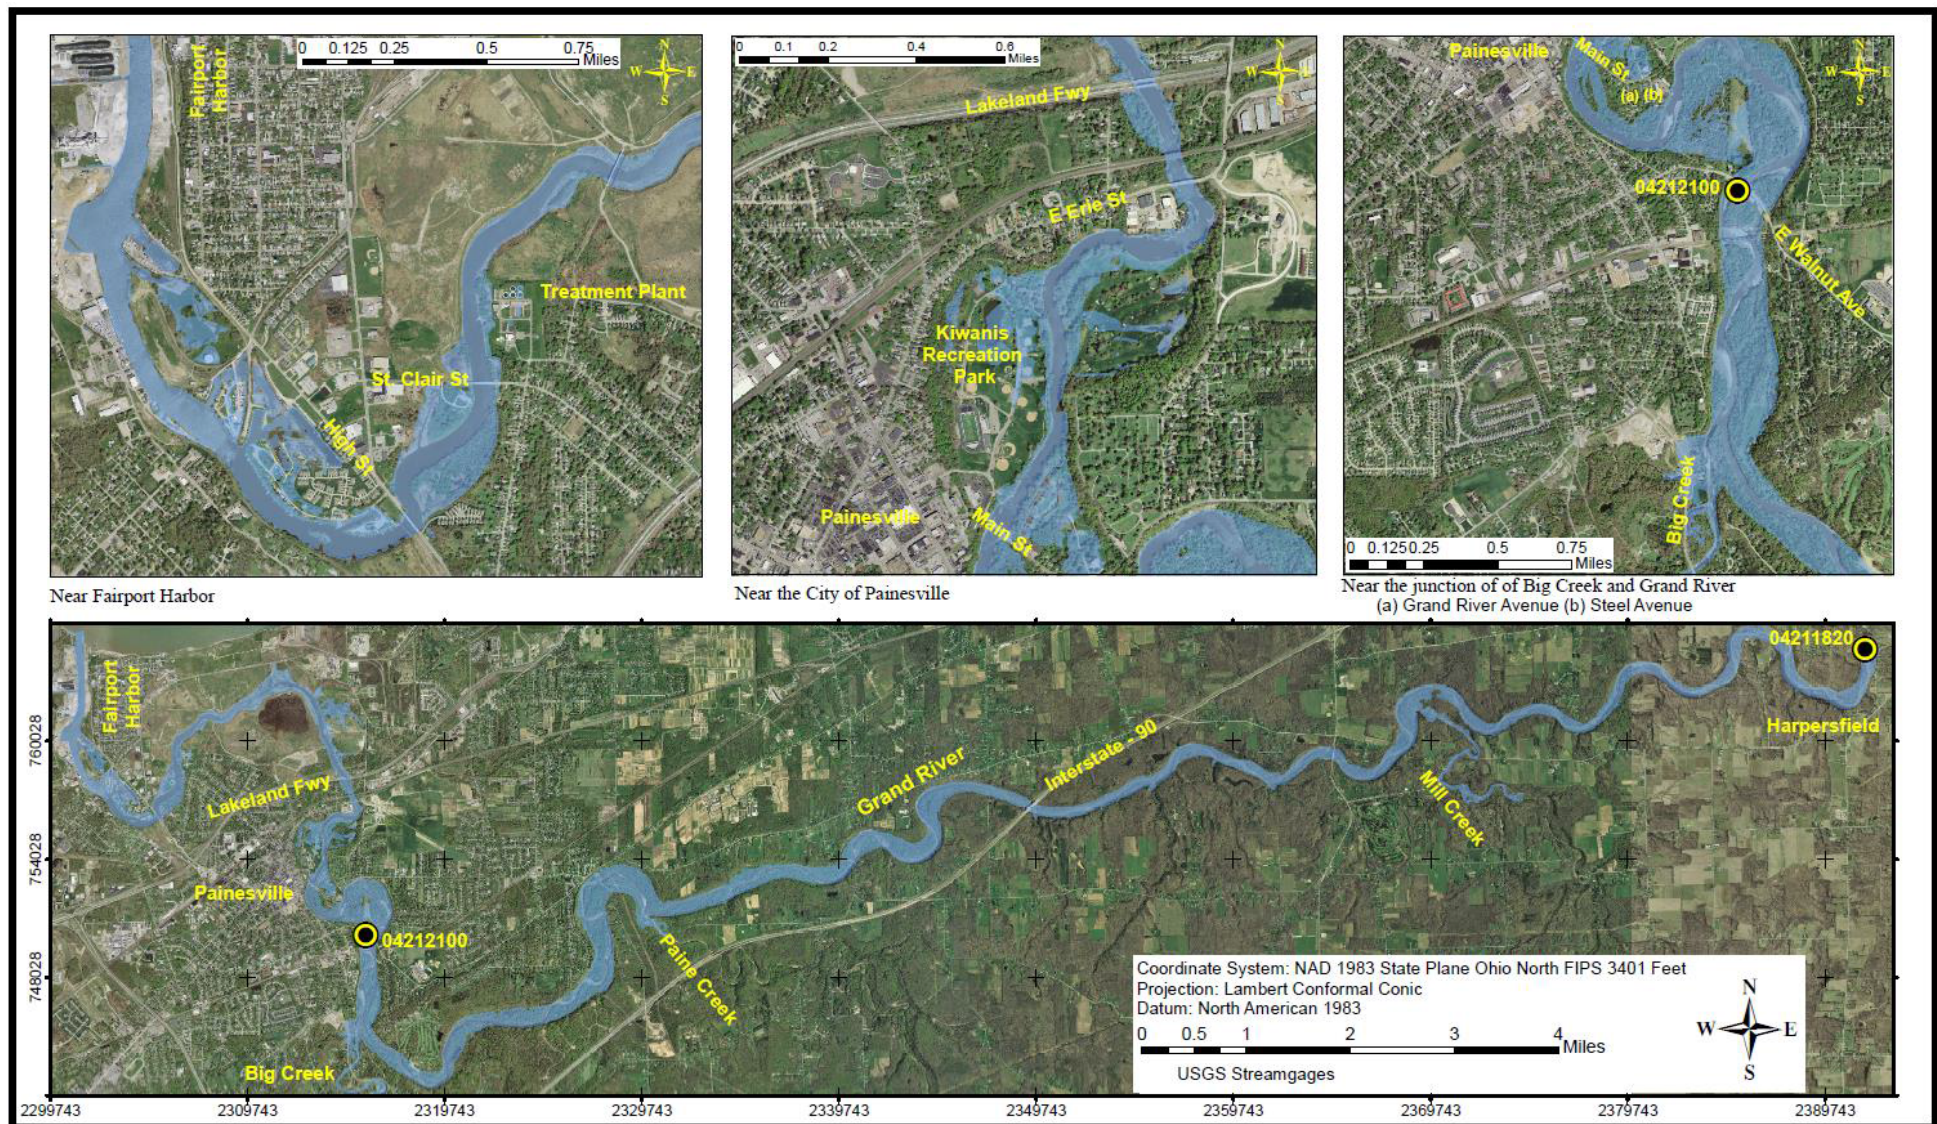

Figure S5 : Flood inundation map along the Grand River, for the stage of 14.00 feet, 609.59 feet NAVD 88 at 04212100 and the stage of 13.68 feet, 746.68 feet NAVD 88 at 04211820



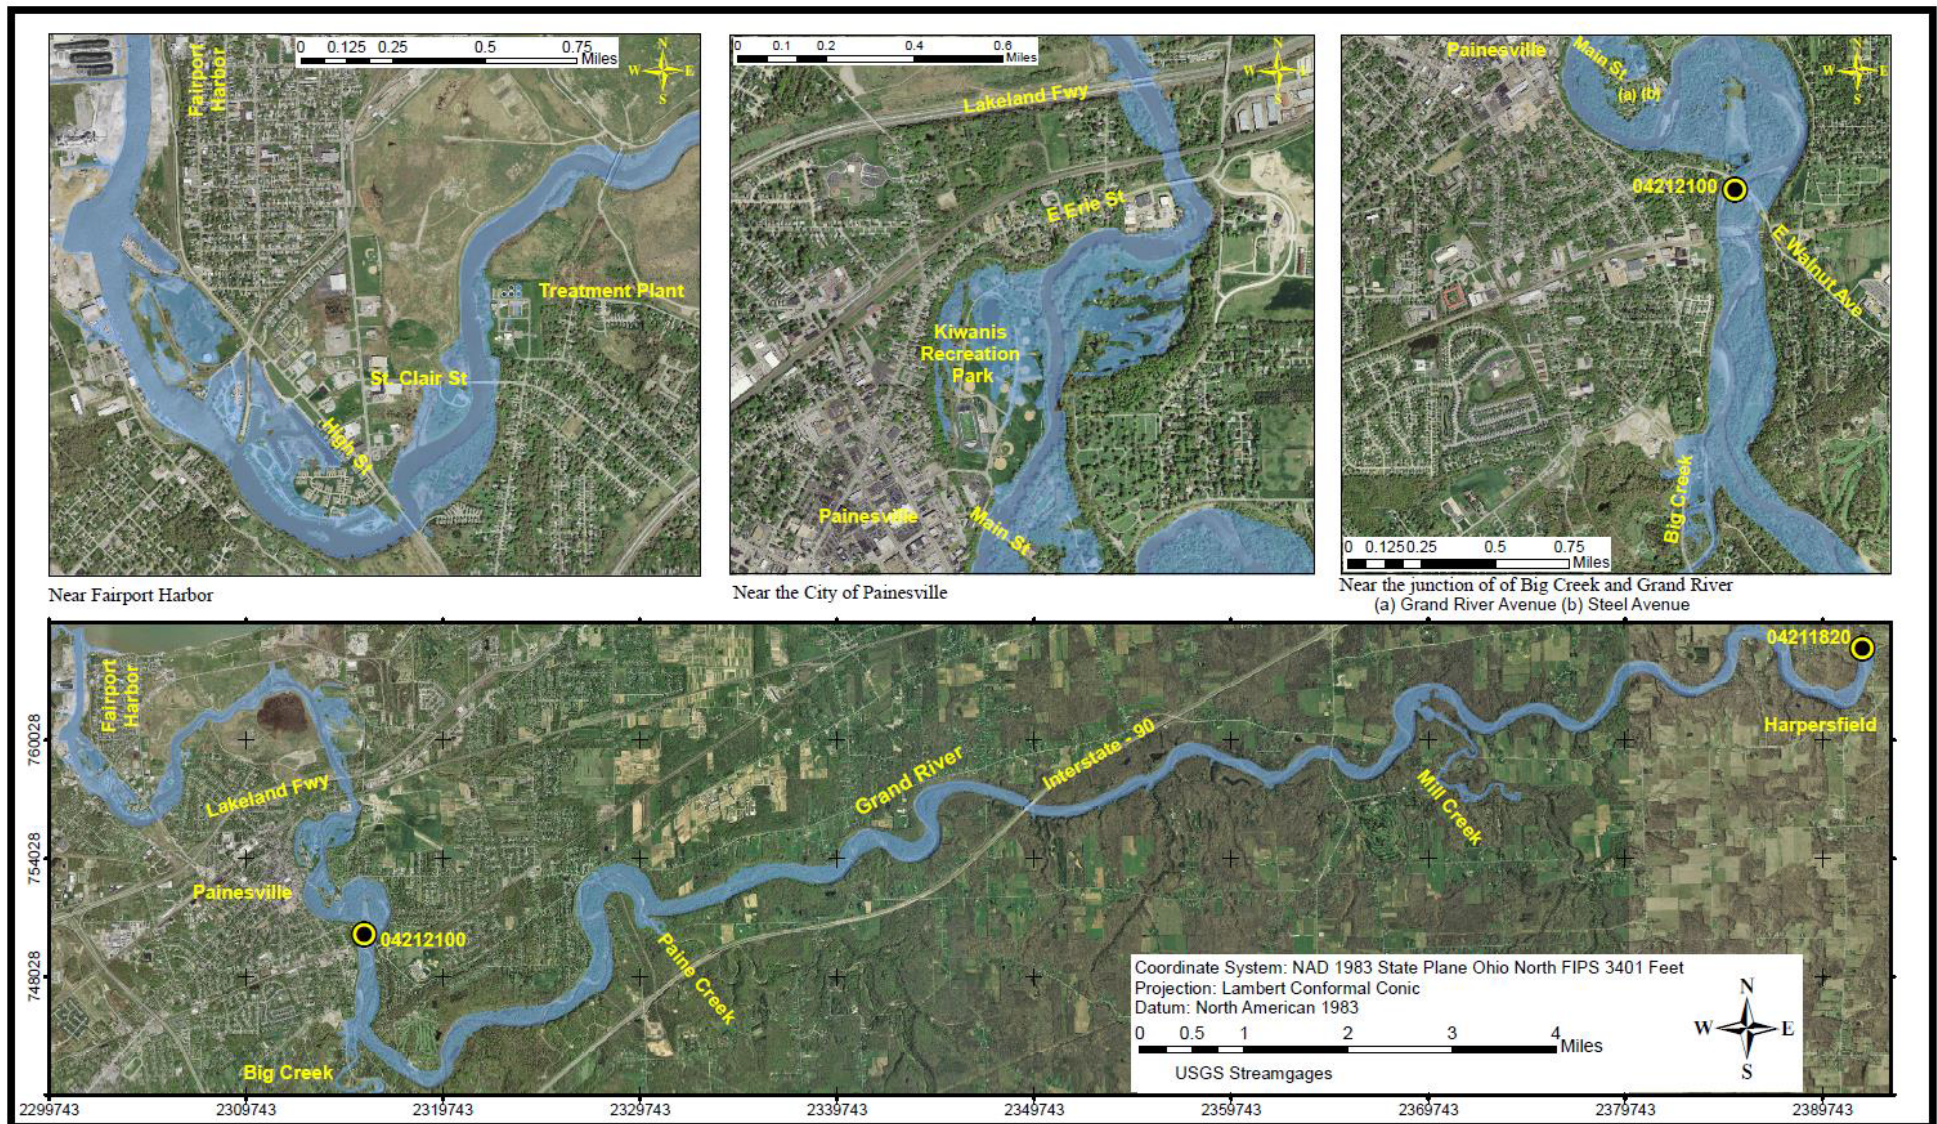

Figure S6 : Flood inundation map along the Grand River, for the stage of 15.00 feet, 610.59 feet NAVD 88 at 04212100 and the stage of 14.53 feet, 747.53 feet NAVD 88 at 04211820



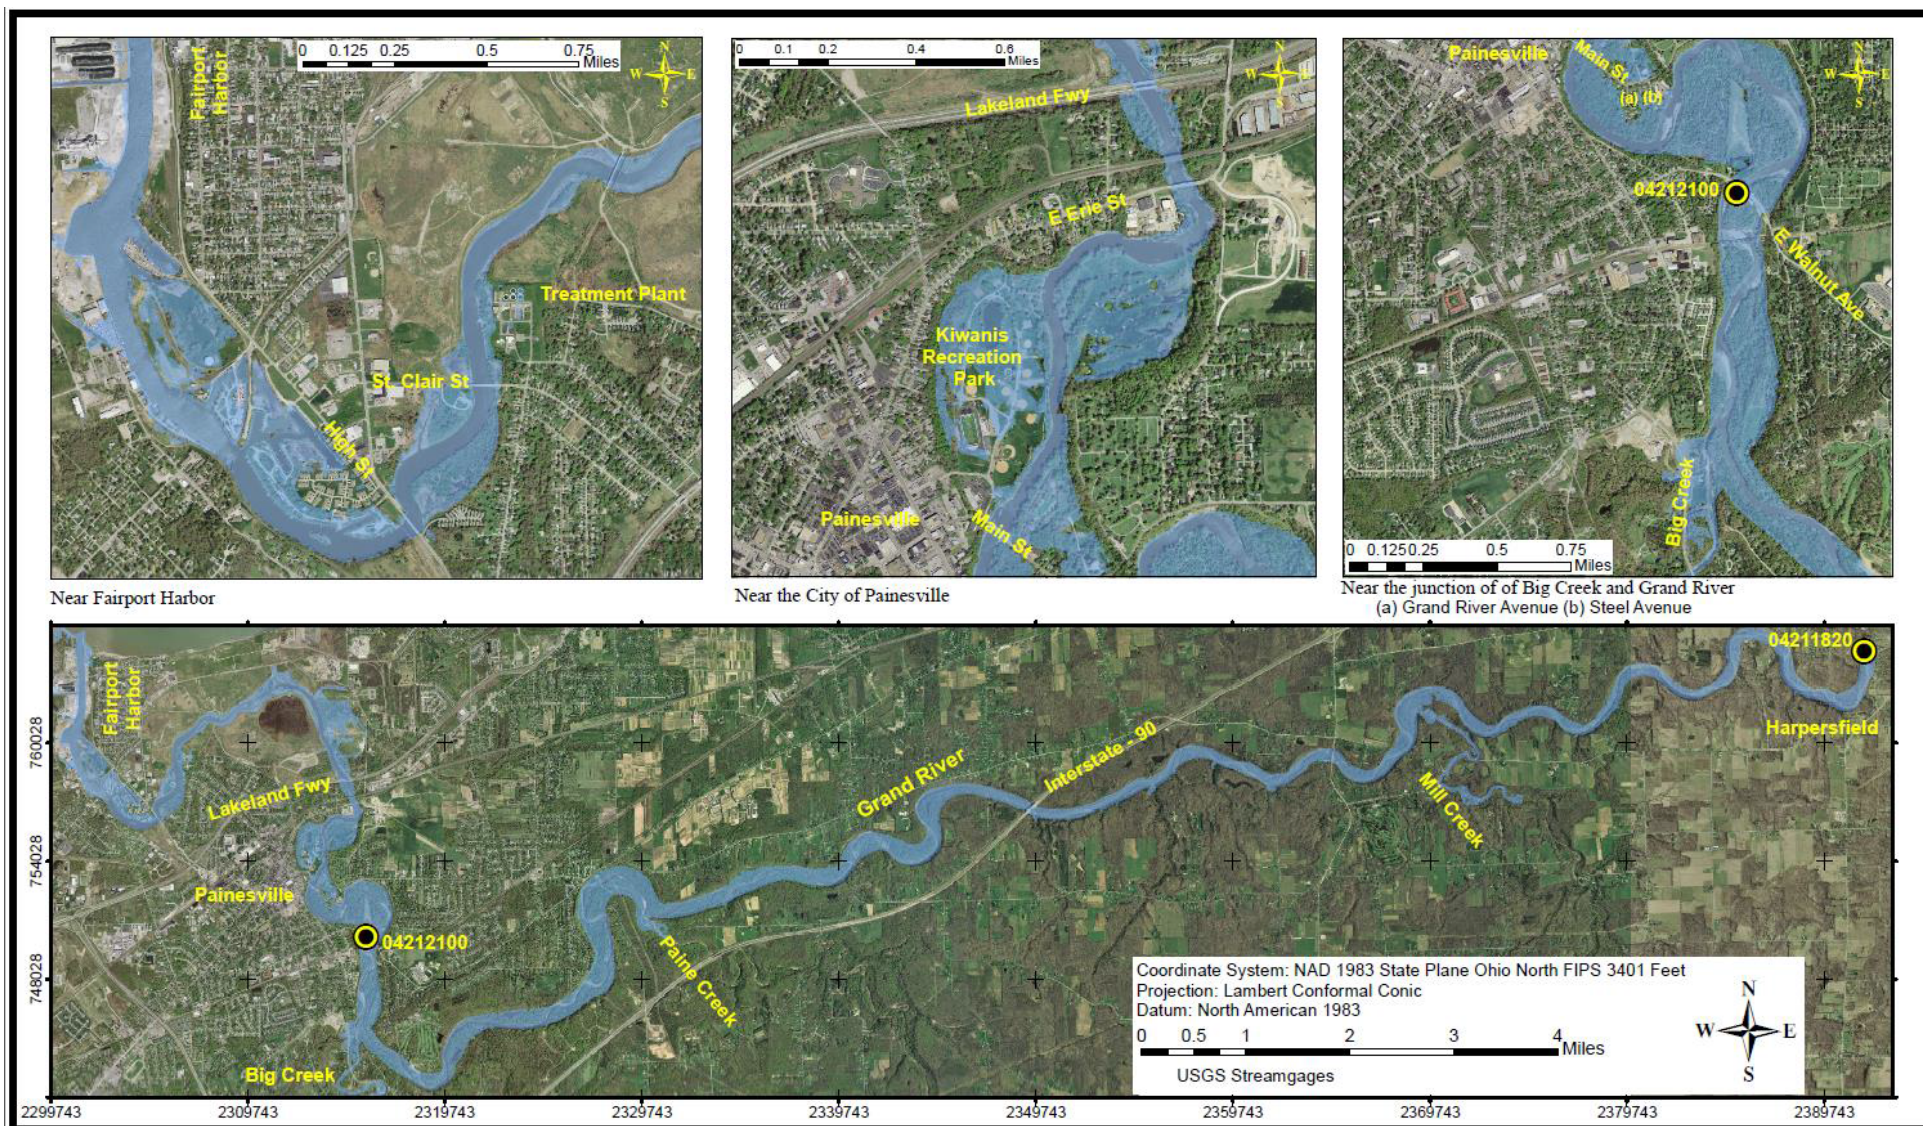

Figure S7 : Flood inundation map along the Grand River, for the stage of 16.00 feet, 611.59 feet NAVD 88 at 04212100 and the stage of 15.35 feet, 748.35 feet NAVD 88 at 04211820



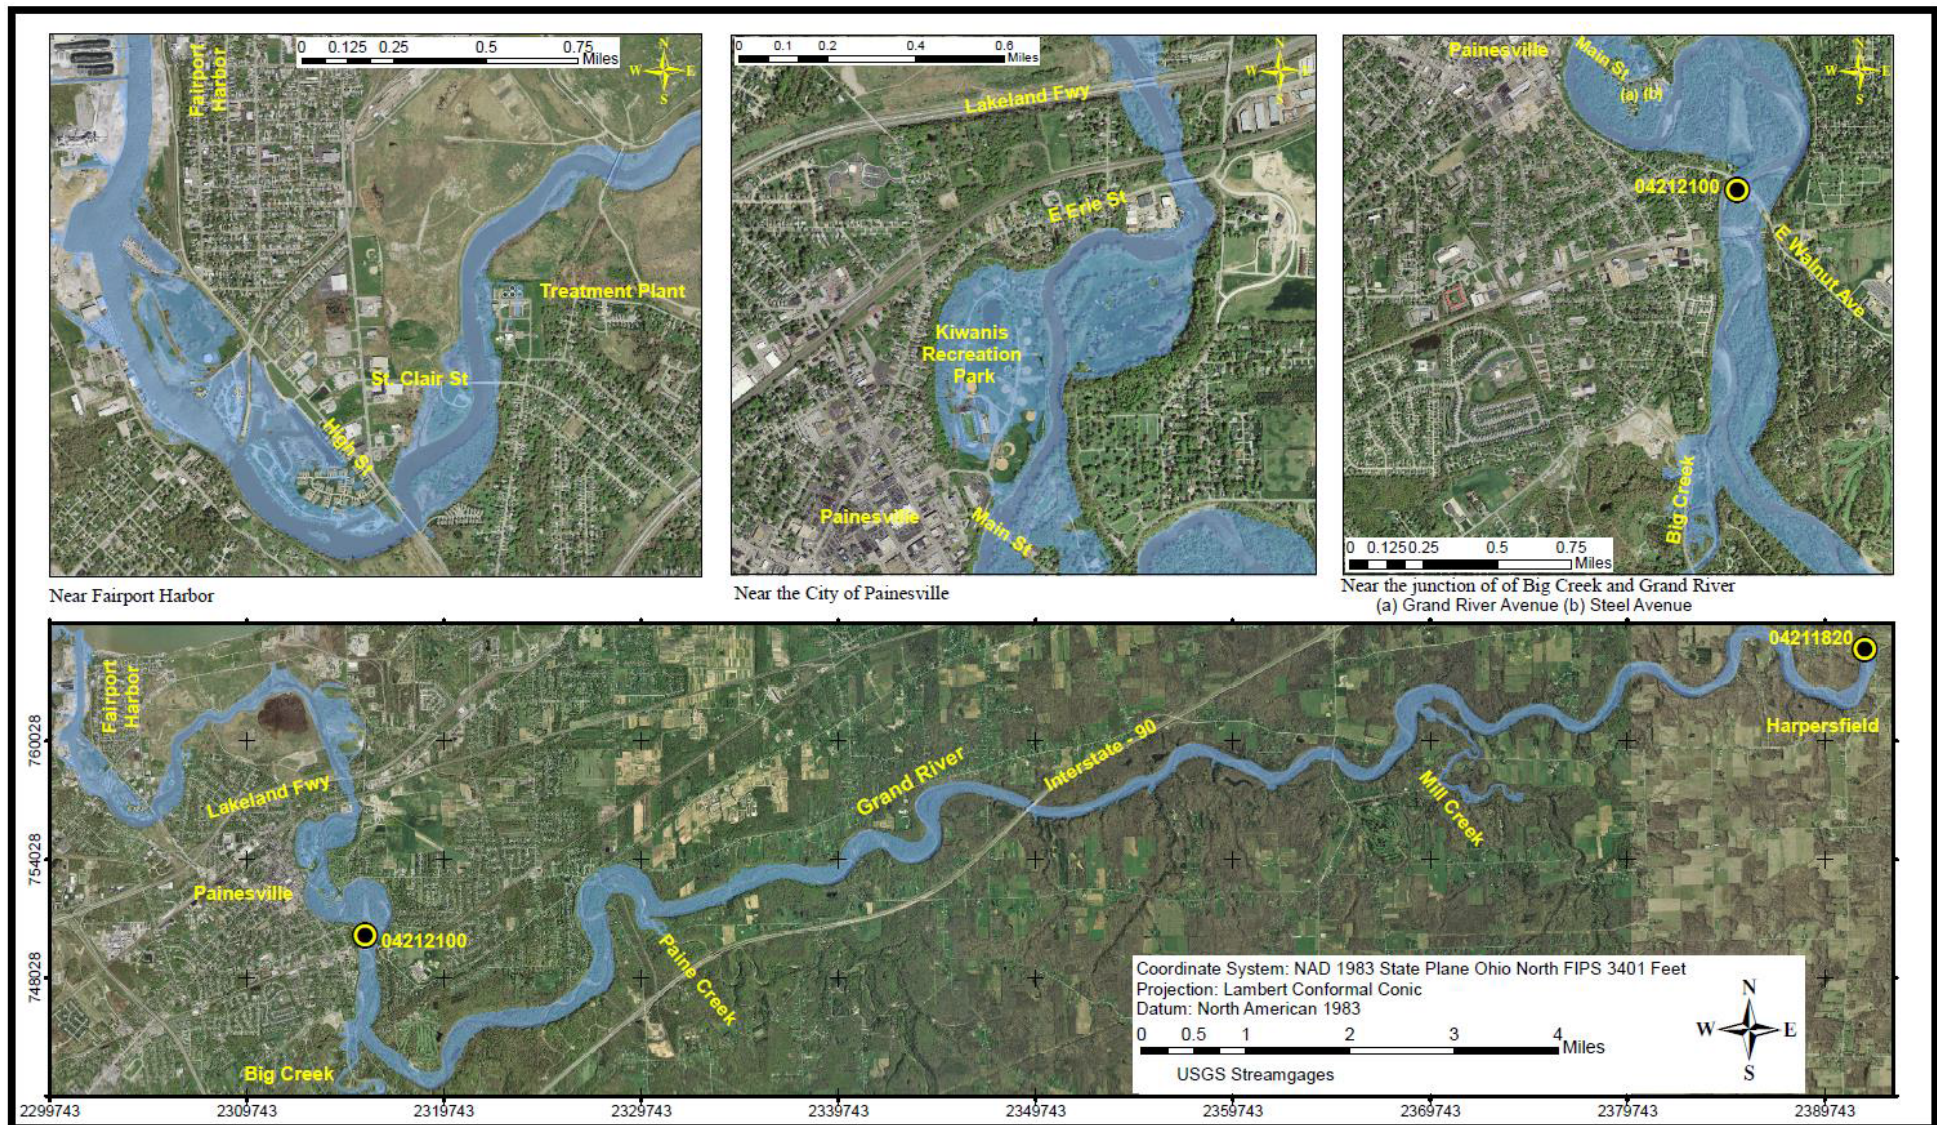

Figure S8 : Flood inundation map along the Grand River, for the stage of 17.00 feet, 612.59 feet NAVD 88 at 04212100 and the stage of 16.15 feet, 749.15 feet NAVD 88 at 04211820



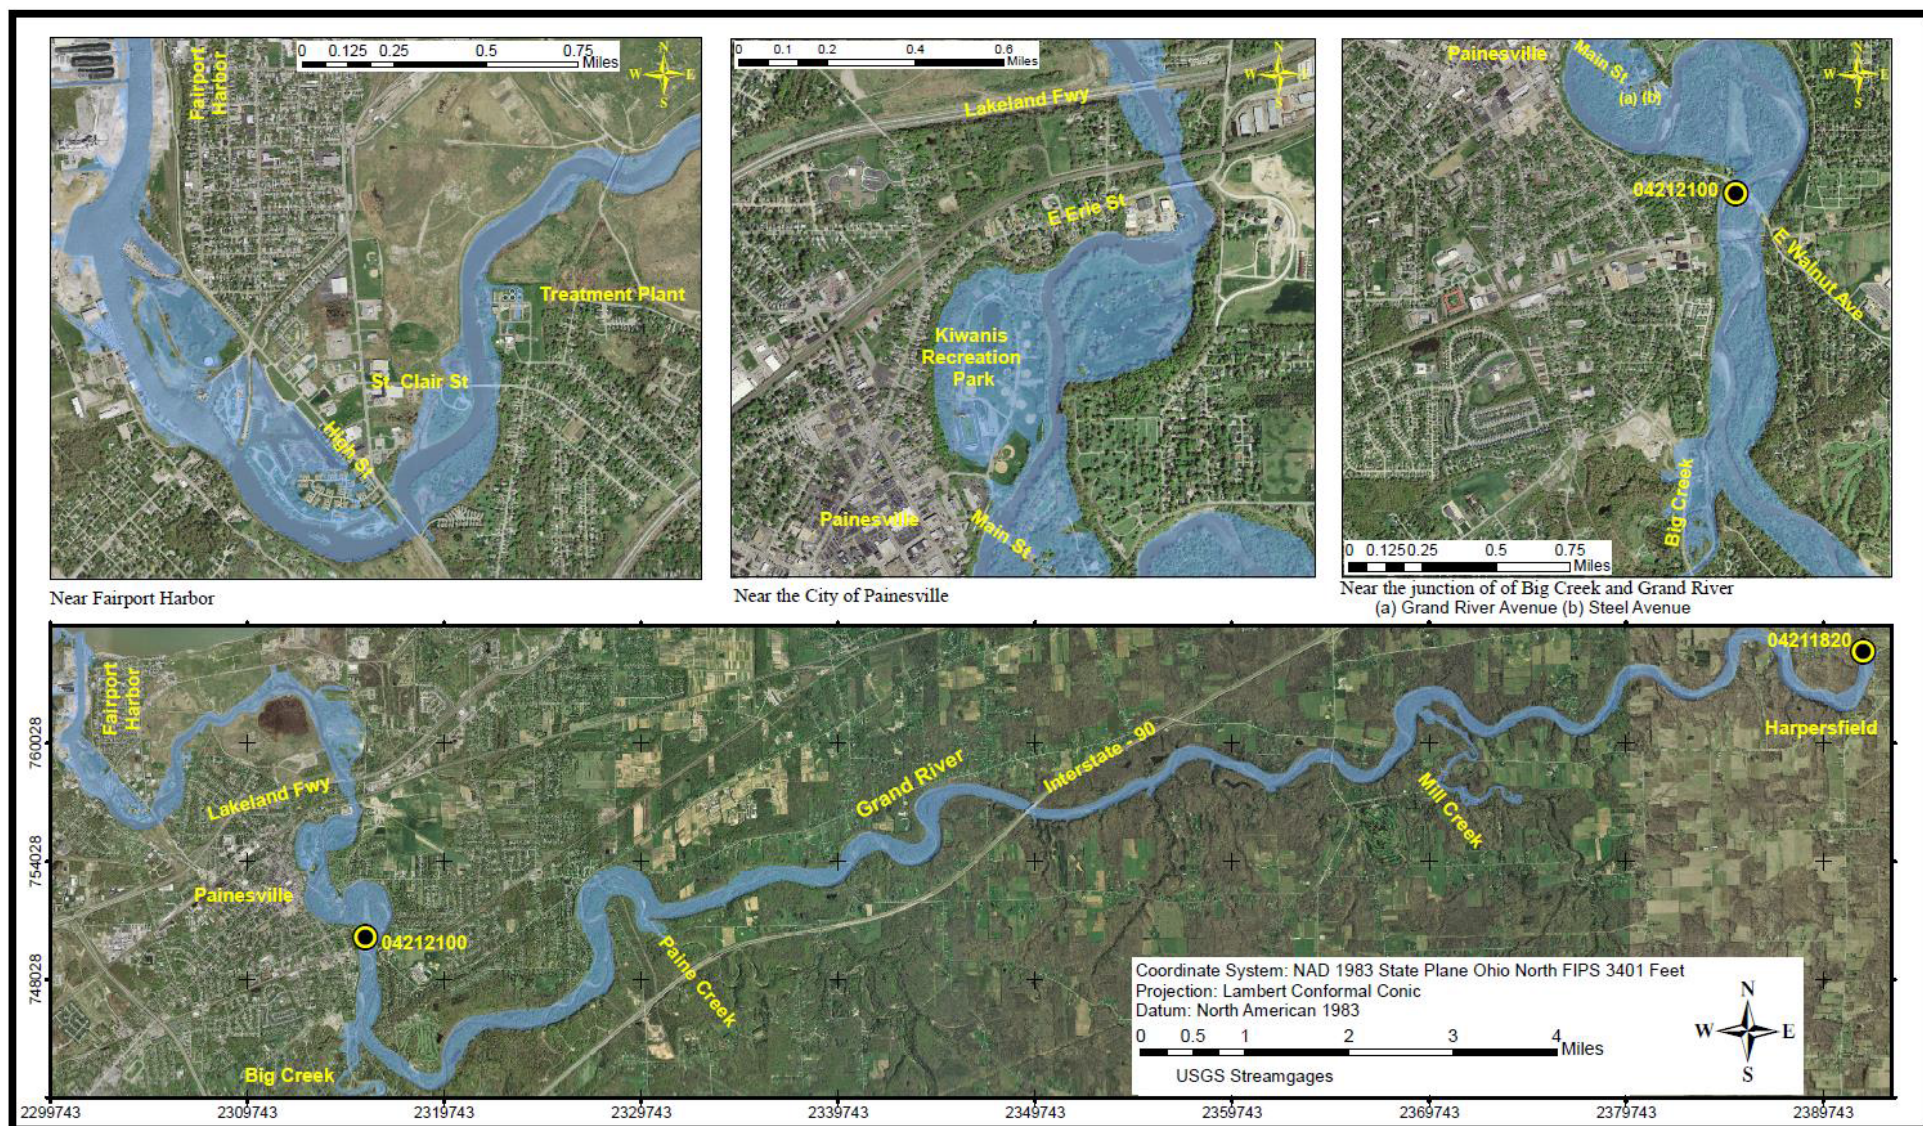

Figure S9 : Flood inundation map along the Grand River, for the stage of 18.00 feet, 613.59 feet NAVD 88 at 04212100 and the stage of 16.96 feet, 749.96 feet NAVD 88 at 04211820



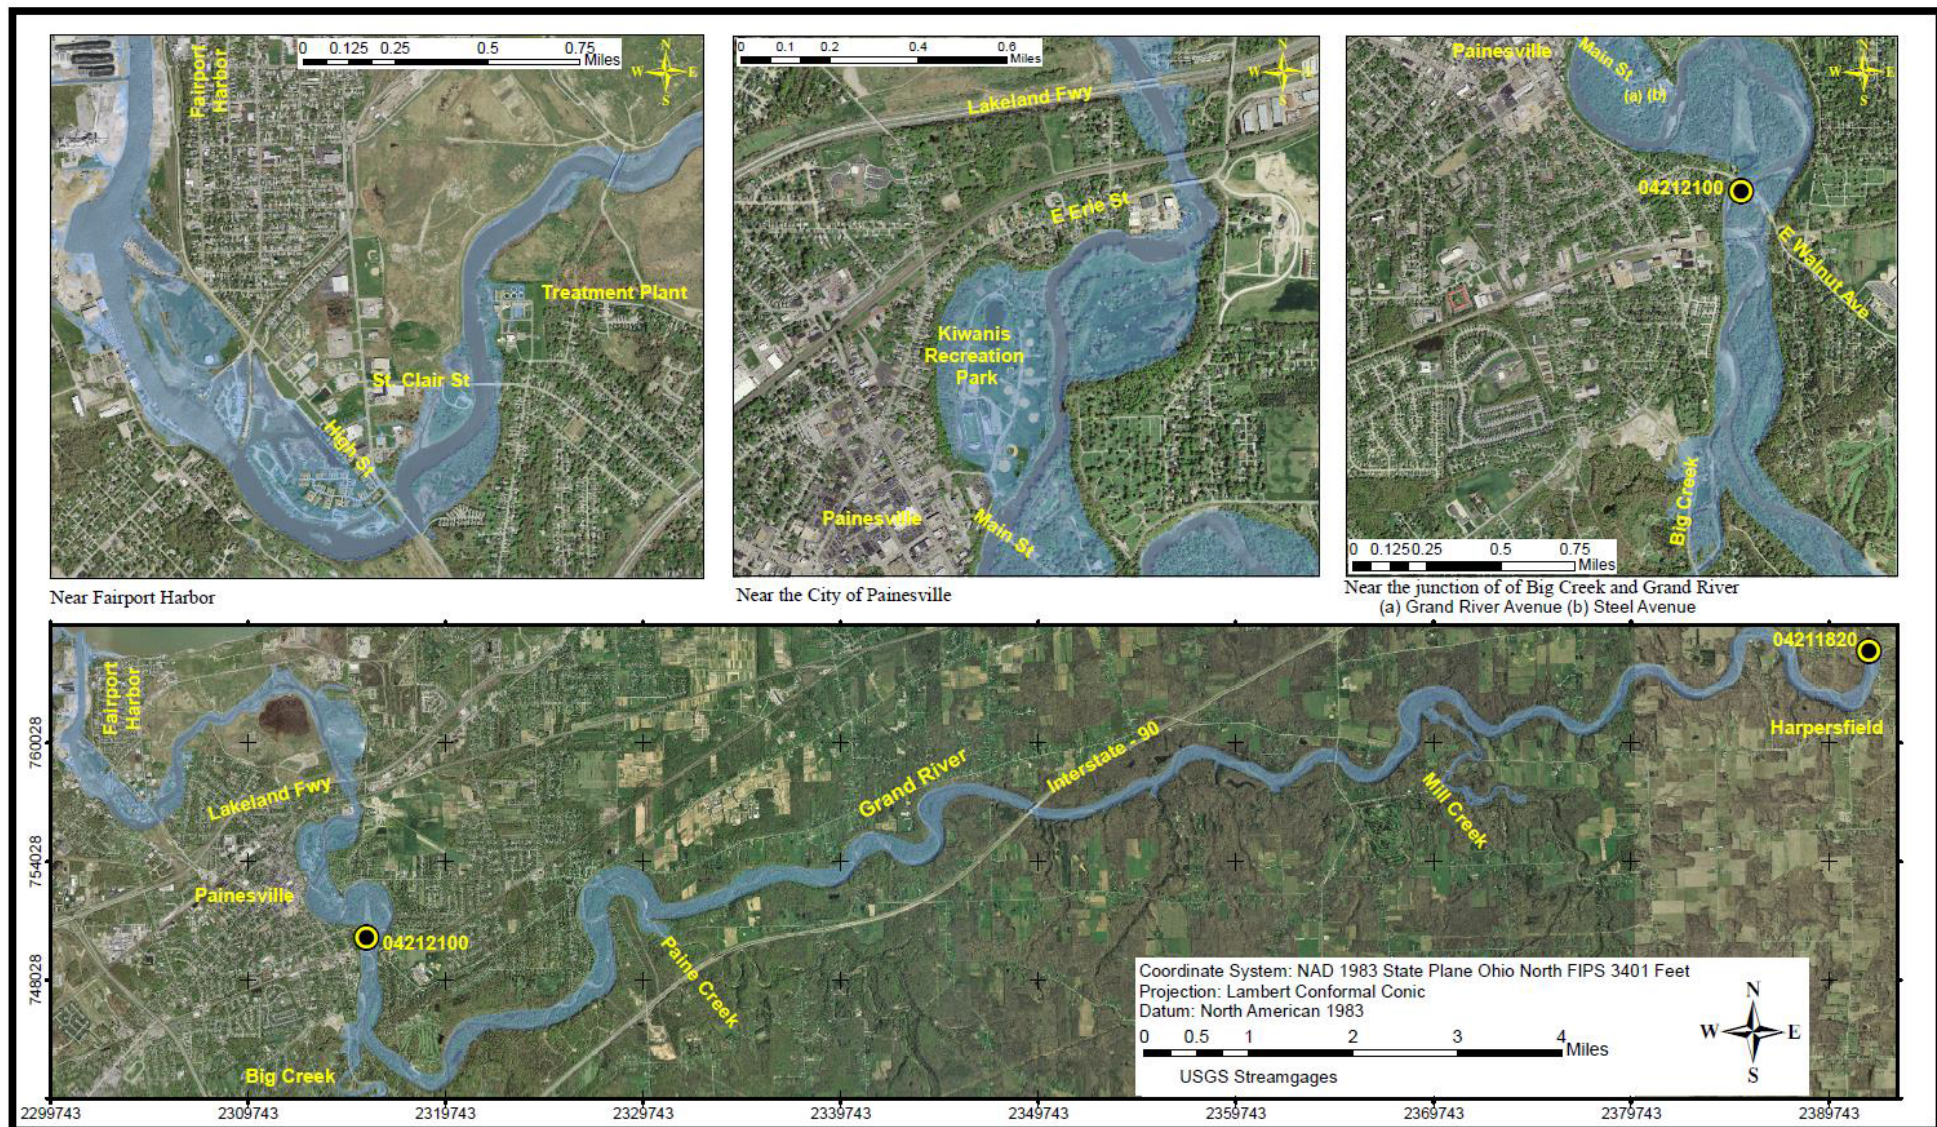

Figure S10 : Flood inundation map along the Grand River, for the stage of 19.35 feet, 614.94 feet NAVD 88 at 04212100 and the stage of 18.10 feet, 751.10 feet NAVD 88 at 04211820



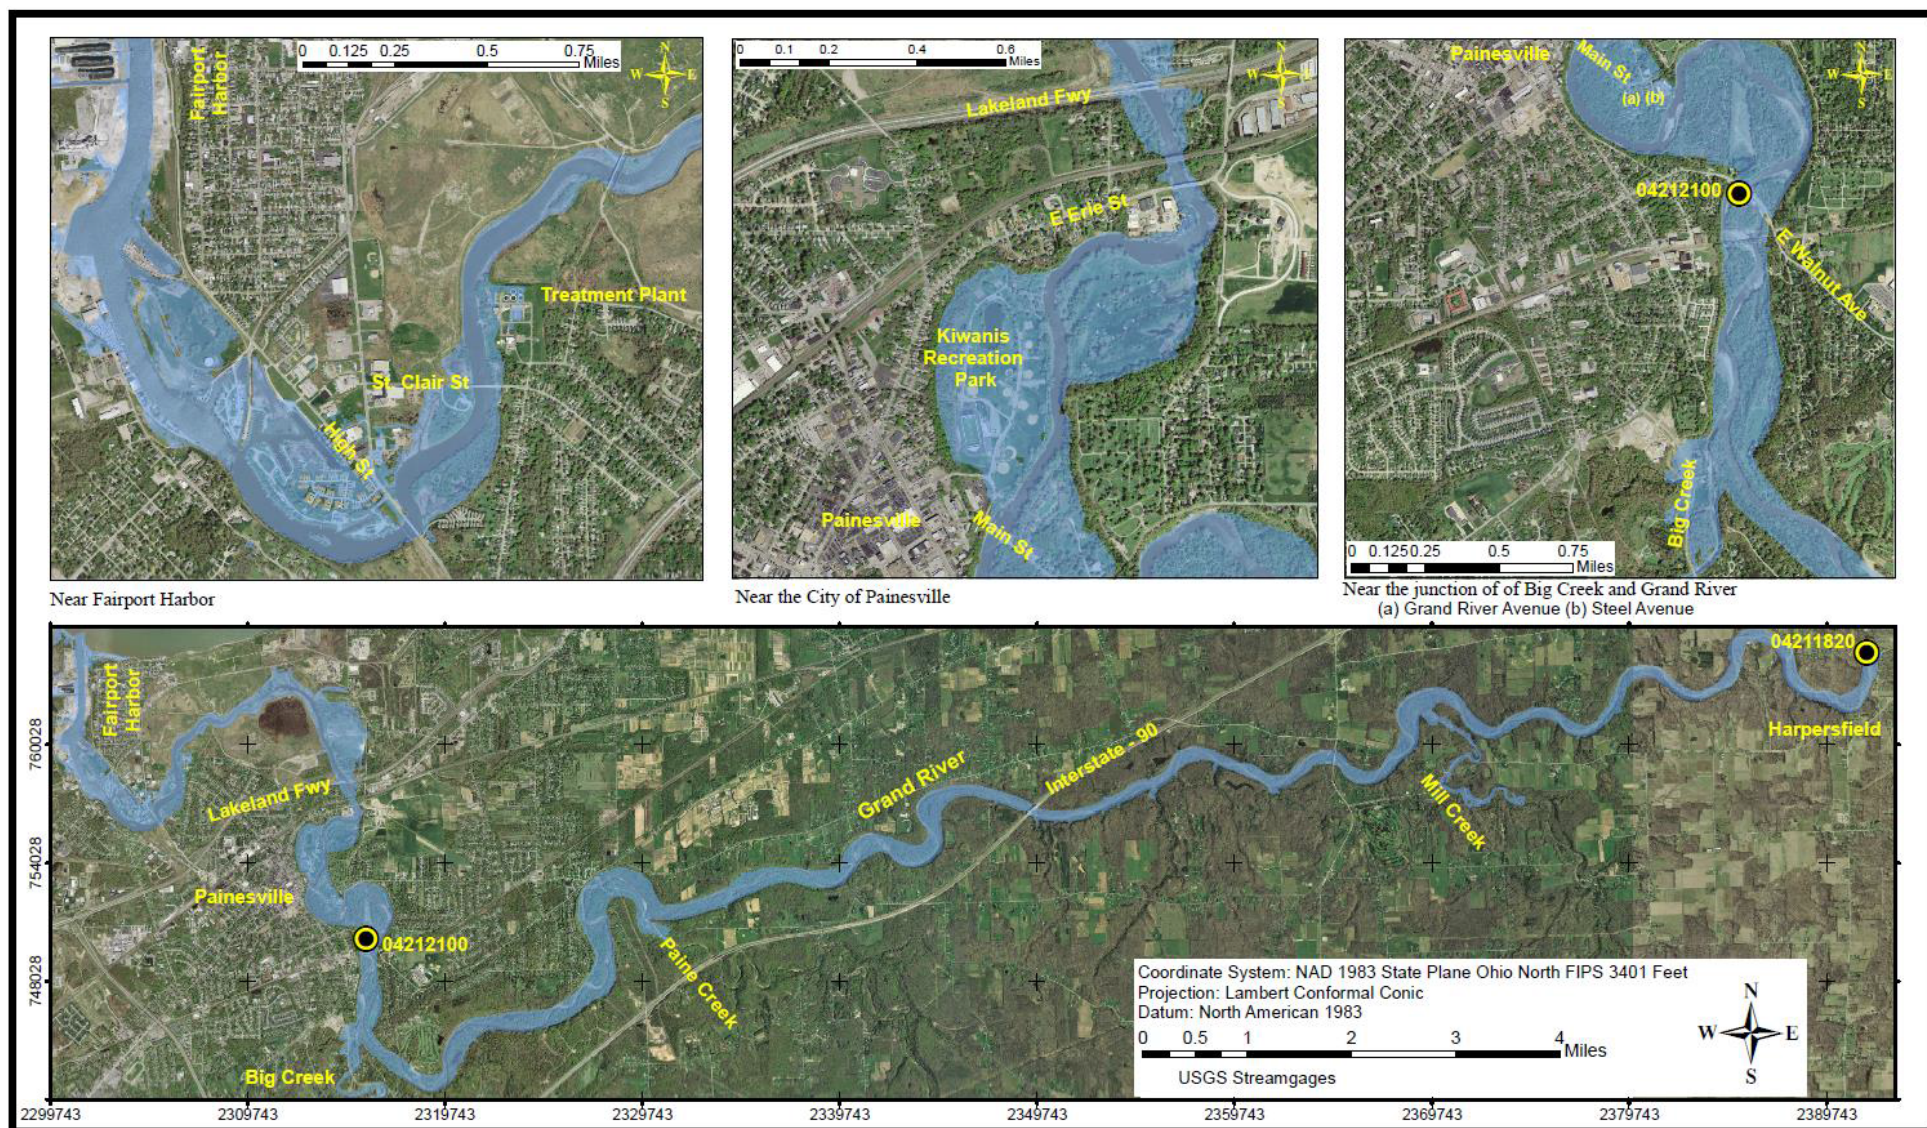

Figure S11 : Flood inundation map along the Grand River, for the stage of 20.00 feet, 615.59 feet NAVD 88 at 04212100 and the stage of 18.62 feet, 751.62 feet NAVD 88 at 04211820



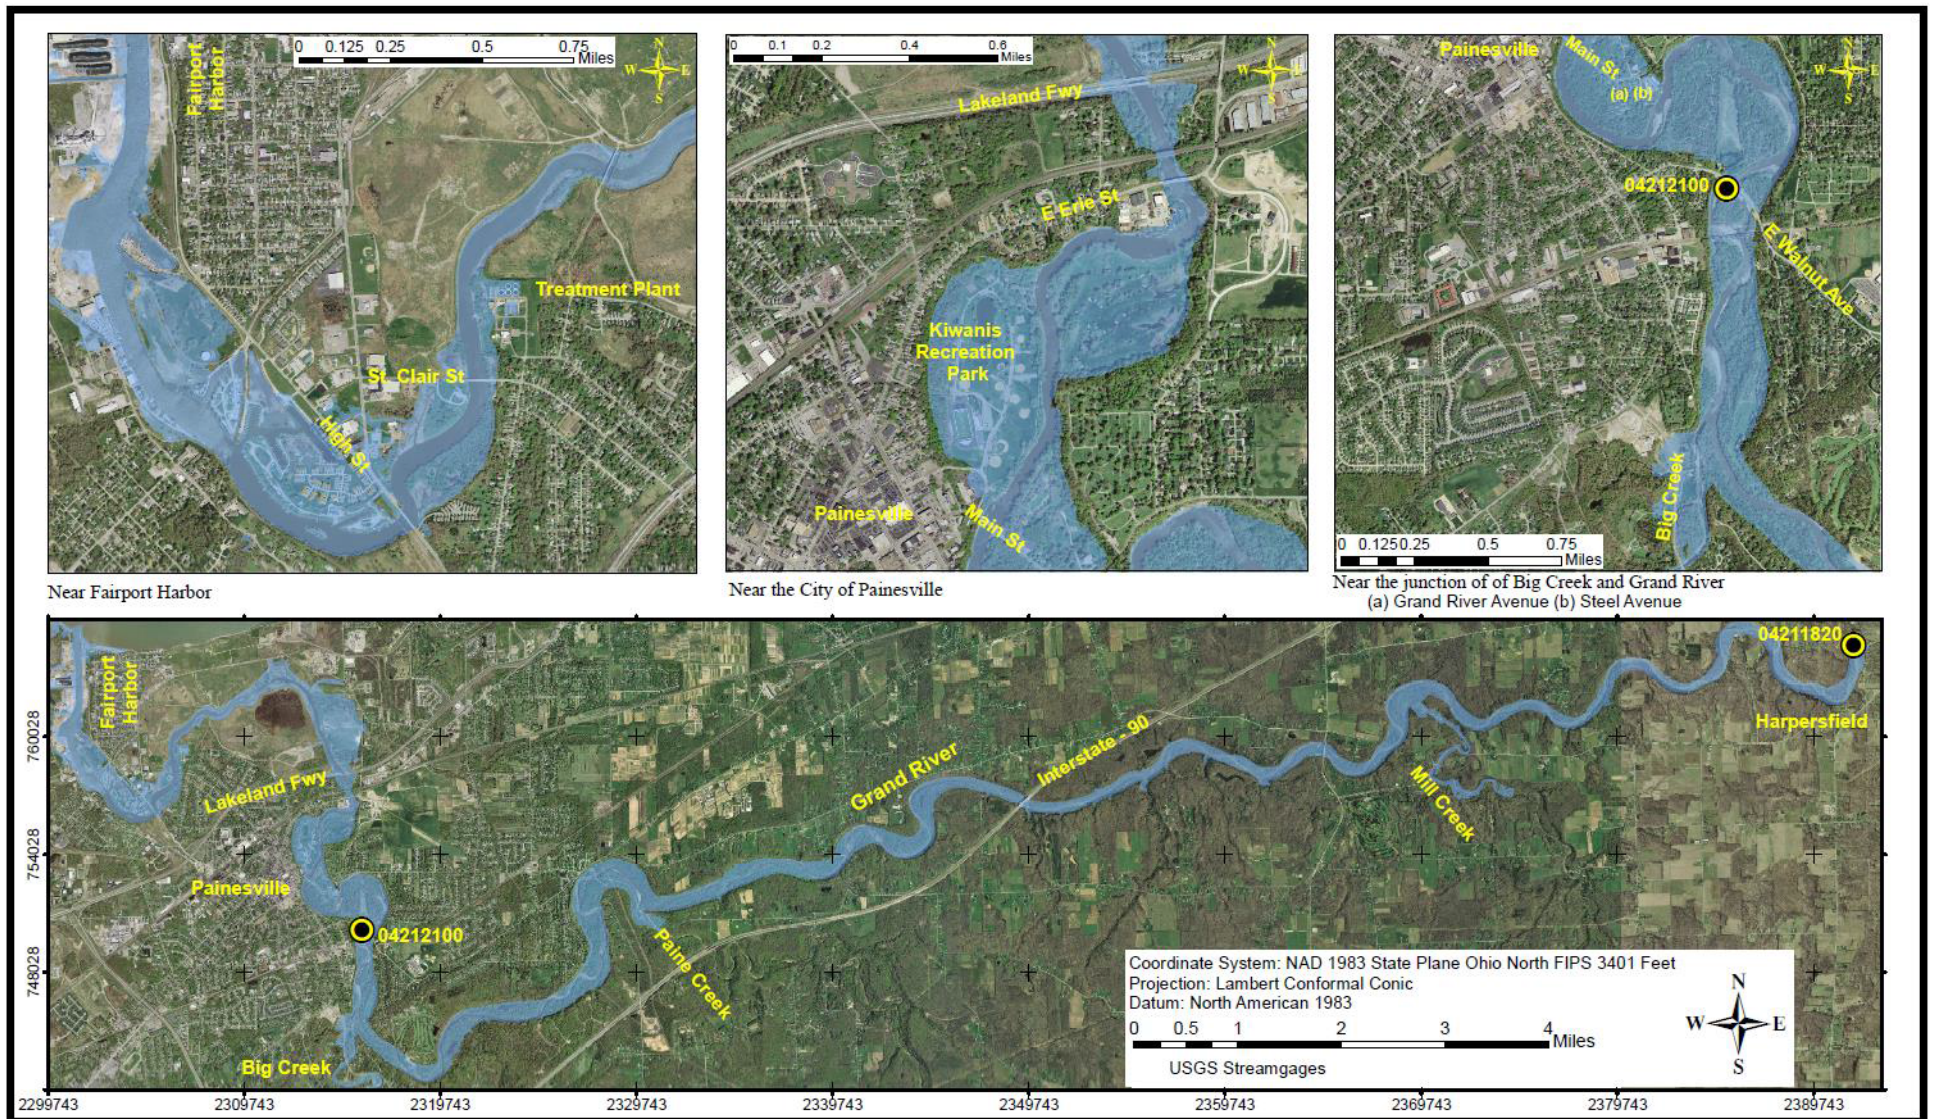

Figure S12 : Flood inundation map along the Grand River, for the stage of 21.00 feet, 616.59 feet NAVD 88 at 04212100 and the stage of 19.42 feet, 752.42 feet NAVD 88 at 04211820
